# Supplementary material
Source: publisher site journal article supplement (https://www.dovepress.com/article/222903)
Supplement: Supplementary file 1 [file get_supplementary_file.php]

**Supplementary material**


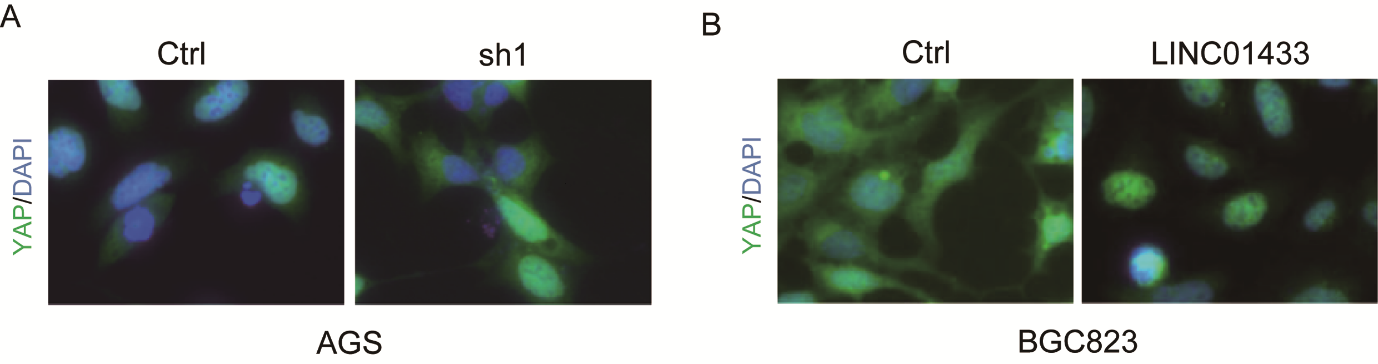


**Figure S1** LINC01433 promotes the translocation of YAP into the nucleus.

Notes: **A**) AGS cells with or without LINC01433 knockdown were immunostained with a YAP-specific antibody (green). DAPI (blue) was used to stain DNA. **B**) BGC823 cells with or without LINC01433 knockdown were immunostained with a YAP-specific antibody (green). DAPI (blue) was used to stain DNA.
